# Supplementary material for: Cofactor F<sub>420</sub>-Dependent Enzymes: An Under-Explored Resource for Asymmetric Redox Biocatalysis
Source: Preprints.org preprint supplement (doi:10.20944/preprints201909.0244.v1), 2019-09-21
Supplement: Supplementary file 3 [file supplementary]

## Sheet: deltaG of formations
Abbreviation	Name	Formula (charged)	Charge	# of protons	std. Gibbs free energy (Kcal/mole)	Ref	std. Gibbs free energy (KJ/mole)	std. transformed Gibbs free energy (KJ/mole) [ref 2]	Formula (used in the F420 biosynthesis pathway)	Charge	# of protons	std. transformed Gibbs free energy (KJ/mole) [ref 2]		Parameters	Values	Units
5AD	5`-Deoxyadenosine	C10H13N5O3	0	13	-5.51	3, 4	-23.0538	506.904	C10H13N5O3	0	13	506.904		pH	7
5ARPD	4-(1-D-Ribitylamino)-5-aminouracil	C9H16N4O6	0	16	-189.57	3, 4	-793.161	-140.905	C9H16N4O6	0	16	-140.905		I	0.25	M
5ARPD4HB	5-amino-5-(4-hydroxybenzyl)-6-(D-ribitylimino)-5,6-dihydrouracil	C16H22N4O7	0	22	16.65	5	69.6636	966.515	C16H22N4O7	0	22	966.515		T	298.15	K
df420-0	dehydro coenzyme ferredoxin 420-0	C19H21N3O12P	-3	21	-425.46	3	-1780.12	-931.326	C19H19N3O12P	-1	19	-1006.38		B	1.6	(L/mol)^0.5
eppg	lactyl-(2)-diphospho-(5')-guanosine	C13H16N5O13P2	-3	16	-577.97	3, 4	-2418.23	-1773.26	C13H18N5O13P2	-1	18	-1685.25		R	8.31451	J/(mol*K)
f0	7,8-didemethyl-8-hydroxy-5-deazariboflavin	C16H16N3O7	-1	16	-151.29	3	-632.997	18.4484	C16H17N3O7	0	17	60.0241
f0	7,8-didemethyl-8-hydroxy-5-deazariboflavin	C16H16N3O7	-1	16	-165.59	4	-692.829	-41.3828	C16H17N3O7	0	17	0.192869
f420-0	coenzyme ferredoxin 420-0	C19H19N3O12P	-3	19	-425.46	3	-1780.12	-1012.86	C19H21N3O12P	-1	21	-924.849
f420-0	coenzyme ferredoxin 420-0	C19H19N3O12P	-3	19	-439.76	4	-1839.96	-1072.69	C19H21N3O12P	-1	21	-984.68			deltaG of the F420 biosynthesis pathway including 5ARPD4HB
f420-1	coenzyme ferredoxin 420-1	C24H25N4O15P	-4	25	-532.44	3	-2227.73	-1221.53	C24H28N4O15P	-1	28	-1087.09				set 1	set 2	set 3	set 4	mean	std. dev.
f420-1	coenzyme ferredoxin 420-1	C24H25N4O15P	-4	25	-546.74	4	-2287.56	-1281.37	C24H28N4O15P	-1	28	-1146.92			CofC	138.487	4.04425	138.487	4.04425	71.2657	67.2215
f420-2	coenzyme ferredoxin 420-2	C29H31N5O18P	-5	32	-653.72	3	-2735.16	-1450.9	C29H34N5O18P	-2	34	-1352.36			CofG	-225.88	-225.88	-225.88	-225.88	-225.88	0
f420-2	coenzyme ferredoxin 420-2	C29H32N5O18P	-5	32	-653.72	4	-2735.16	-1450.9	C29H34N5O18P	-2	34	-1352.36			CofH	-843.913	-885.488	-903.744	-945.32	-894.616	36.4291
f420-3	coenzyme ferredoxin 420-3	C34H37N6O21P	-6	37	-746.4	3	-3122.94	-1643.75	C34H40N6O21P	-3	40	-1499.59			CofD	-185.131	62.7039	-125.299	122.535	-31.2977	127.477
f420-3	coenzyme ferredoxin 420-3	C34H37N6O21P	-6	37	-760.7	4	-3182.77	-1703.58	C34H40N6O21P	-3	40	-1559.42			CofX	36.861	-126.203	-22.9702	-186.034	-74.5865	86.847
f420-4	coenzyme ferredoxin 420-4	C39H43N7O24P	-7	43	-853.38	3	-3570.54	-1857.28	C39H46N7O24P	-4	46	-1708.26			CofE 1	16.5271	-31.5259	16.5271	-31.5259	-7.49944	24.0265
f420-4	coenzyme ferredoxin 420-4	C39H43N7O24P	-7	43	?	4	?	?	C39H46N7O24P	-4	46	#VALUE!			CofE 2	-86.4991	-52.2105	-26.6679	7.62068	-39.4392	34.48
f420-5	coenzyme ferredoxin 420-5	C44H49N8O27P	-8	49	-960.36	3	-4018.15	-2072.43	C44H52N8O27P	-5	52	-1918.56			CofE 3	31.5439	-15.6994	-28.2873	-75.5306	-21.9933	38.1173
f420-5	coenzyme ferredoxin 420-5	C44H49N8O27P	-8	49	?	4	?	?	C44H52N8O27P	-5	52	#VALUE!			whole pathway	-1118	-1270.26	-1177.83	-1330.09	-1224.05	81.7949
f420-6	coenzyme ferredoxin 420-6	C49H55N9O30P	-9	55	-1067.34	3	-4465.75	-2289.21	C49H55N9O30P	-9	55	-2289.21				-1118	-1270.26	-1177.83	-1330.09	-1224.05	81.7949
f420-6	coenzyme ferredoxin 420-6	C49H55N9O30P	-9	55	?	4	?	?	C49H55N9O30P	-9	55	#VALUE!
f420-7	coenzyme ferredoxin 420-7	C54H61N10O33P	-10	61	-1174.32	3	-4913.35	-2507.6	C54H61N10O33P	-10	61	-2507.6
f420-7	coenzyme ferredoxin 420-7	C54H61N10O33P	-10	61	?	4	?	?	C54H61N10O33P	-10	61	#VALUE!			deltaG of the F420 biosynthesis pathway excluding 5ARPD4HB
fmn	Flavin mononucleotide (oxidized)	C17H20N4O9P	-1	20	-337.52	1	-1412.18	-597.674	C17H19N4O9P	-2	19	-640.869				set 1	set 2	set 3	set 4	mean	std. dev.
fmnh2	Flavin mononucleotide (reduced)	C17H22N4O9P	-1	22	-346.33	1	-1449.04	-553.003	C17H21N4O9P	-2	21	-596.198			CofC	138.487	4.04425	138.487	4.04425	71.2657	67.2215
gdp	Guanosine diphosphate	C10H13N5O11P2	-2	13	-516.3	1	-2160.2	-1633.48	C10H12N5O11P2	-3	12	-1678.29			CofG	-1192.39	-1192.39	-1192.39	-1192.39	-1192.39	0
glu	L-Glutamate	C5H8NO4	-1	8	-164.13	1	-686.72	-361.402	C5H8NO4	-1	8	-361.402			CofH	122.602	81.0264	62.7709	21.1952	71.8986	36.4291
gmp	Guanosine monophosphate	C10H13N5O8P	-1	13	-308.3	1	-1289.93	-760.779	C10H12N5O8P	-2	12	-803.974			CofD	-185.131	62.7039	-125.299	122.535	-31.2977	127.477
gtp	Guanosine triphosphate	C10H13N5O14P3	-3	13	-724.3	1	-3030.47	-2507.8	C10H12N5O14P3	-4	12	-2554.23			CofX	36.861	-126.203	-22.9702	-186.034	-74.5865	86.847
h	proton	H	1	1	-9.53	1	-39.8735	0.0827742	H	1	1	0.0827742			CofE 1	16.5271	-31.5259	16.5271	-31.5259	-7.49944	24.0265
ImiAce	2-iminoacetate, Dehydroglycine	C2H2N1O2	-1	2	-316.46	4	-1324.07	-1243.35	C2H2N1O2	-1	2	-1243.35			CofE 2	-86.4991	-52.2105	-26.6679	7.62068	-39.4392	34.48
met	L-Methionine	C5H11NO2S	0	11	-75.91	1	-317.607	130.818	C5H11NO2S	0	11	130.818			CofE 3	31.5439	-15.6994	-28.2873	-75.5306	-21.9933	38.1173
nh4	Ammonium	H4N	1	4	-18.97	1	-79.3705	82.8837	H4N	1	4	82.8837			whole pathway	-1118	-1270.26	-1177.83	-1330.09	-1224.05	81.7949
pep	Phosphoenolpyruvate	C3H3O6P	-2	3	-316.08	1	-1322.48	-1203.42	C3H2O6P	-3	2	-1248.23				-1118	-1270.26	-1177.83	-1330.09	-1224.05	81.7949
pi	Phosphate	HO4P	-2	1	-261.974	1	-1096.1	-1058.57	HO4P	-2	1	-1058.57
ppi	Diphosphate	H2O7P2	-2	2	-480.93	1	-2012.21	-1933.92	HO7P2	-3	1	-1978.73
SAMe	S-Adenosyl-L-methionine	C15H23N6O5S	1	23	-66.63	3, 4	-278.78	658.028	C15H23N6O5S	1	23	658.028
tyr	L-Tyrosine	C9H11NO3	0	11	-90.53	1	-378.778	69.6481	C9H11NO3	0	11	69.6481

## Sheet: References and notes
References
1	Jankowski MD, Henry CS, Broadbelt LJ, Hatzimanikatis V: Group contribution method for thermodynamic analysis of complex metabolic networks. Biophys J 2008, 95:1487-1499.
2	Alberty RA: Calculation of standard transformed Gibbs energies and standard transformed enthalpies of biochemical reactants. Arch Biochem Biophys 1998, 353:116-130.
3	Nazem-Bokaee, H., Gopalakrishnan, S., Ferry, J. G., Wood, T. K., and Maranas, C. D. (2016). Assessing methanotrophy and carbon fixation for biofuel production by Methanosarcina acetivorans. Microbial Cell Factories 15, 1–13. doi: 10.1186/s12934-015-0404-4
4	http://modelseed.org/biochem/compounds
5	https://metacyc.org/compound
Notes
1	The ΔfG of lactyl-2-diphospho-5'-guanosine (LPPG) was used for calculating transformed ΔfG of EPPG
